# Supplementary material for: The functional synergism of microRNA clustering provides therapeutically relevant epigenetic interference in glioblastoma
Source: PubMed Central journal article supplement (PMC6347618; doi:10.1038/s41467-019-08390-z), 2019-01-25
Supplement: 41467_2019_8390_MOESM3_ESM.pdf [file 41467_2019_8390_MOESM3_ESM.pdf]

## **Description of Additional Supplementary Files**

**File Name: Supplementary Data 1**

**Description:** MicroRNA expression in GBM vs Brain. List of all annotated microRNA whose difference between GBM and brain specimen is significant at  $p < 0.05$ . Differential expression is reported as Log Fold change, and relative p value of the difference is reported for each microRNA.

**File Name: Supplementary Data 2**

**Description:** List of conserved predicted mRNA targets for miR-124 by analysis with targetscan.org

**File Name: Supplementary Data 3**

**Description:** List of conserved predicted mRNA targets for miR-128 by analysis with targetscan.org

**File Name: Supplementary Data 4**

**Description:** List of conserved predicted mRNA targets for miR-137 by analysis with targetscan.org

**File Name: Supplementary Data 5**

**Description:** Column A reports all the genes found in Histone Modification category GO:001657. Column B reports all the genes found in Negative Transcriptional Regulation category GO:0000122. Column C reports all genes in common between the two categories.

**File Name: Supplementary Data 6**

**Description:** Venn analysis crossing microRNA predicted targets with list of chromatin repressors.
